# Supplementary material for: Serotonin signaling modulates aging-associated metabolic network integrity in response to nutrient choice in Drosophila melanogaster
Source: PubMed Central journal article supplement (PMC8206115; doi:10.1038/s42003-021-02260-5), 2021-06-15
Supplement: 42003_2021_2260_MOESM2_ESM.pdf [file 42003_2021_2260_MOESM2_ESM.pdf]

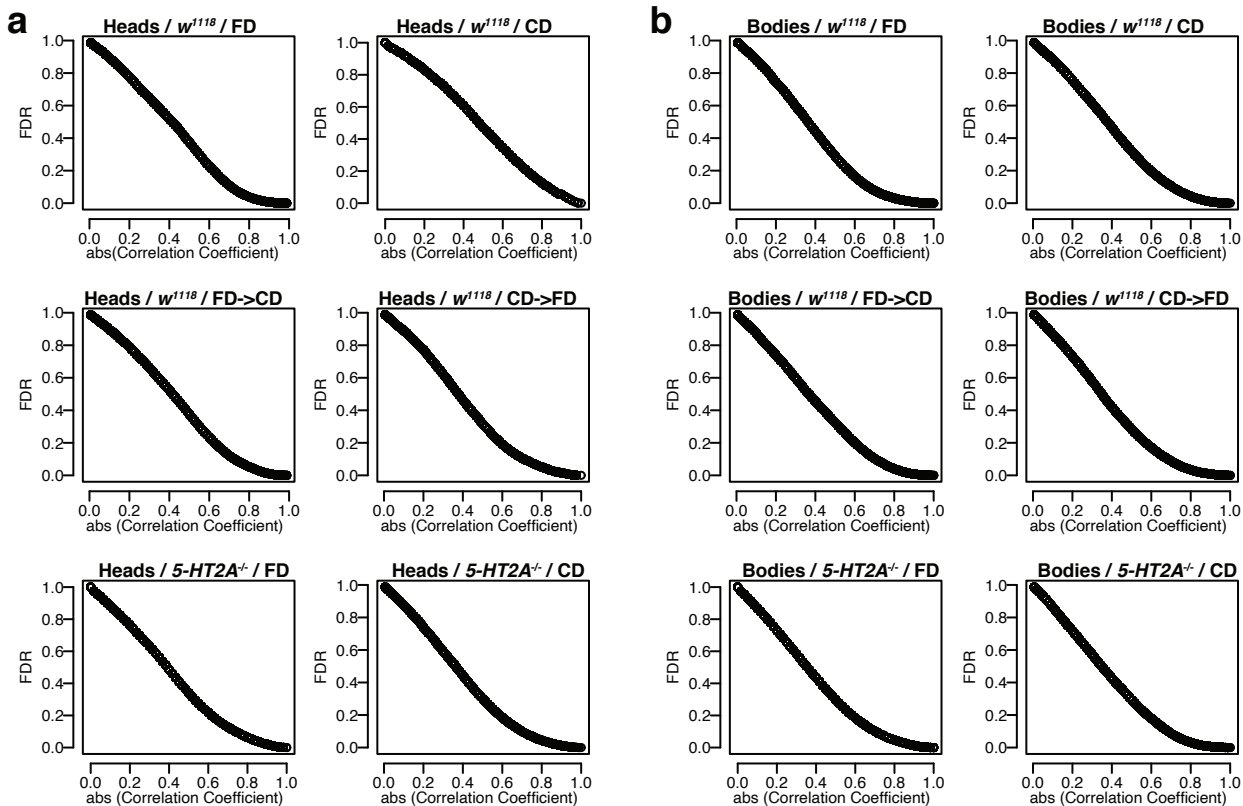

Supplementary Figure 1. Dot plots showing the linear relationship between FDR and the absolute value of correlation coefficient in heads (a) and bodies (b), respectively.

**a FDR  $\leq$  0.10**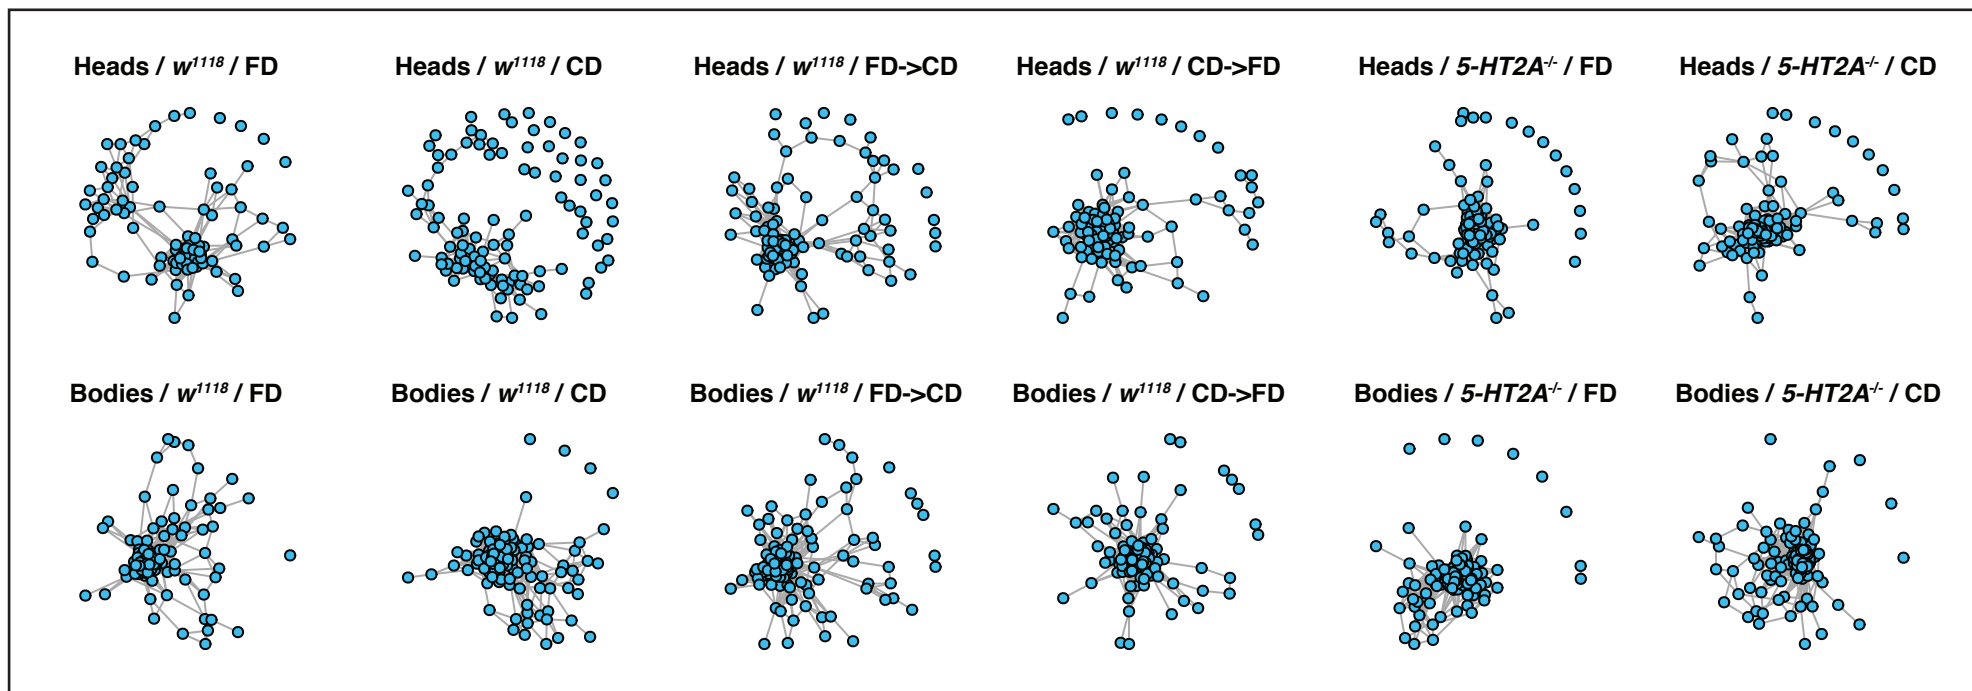**b FDR  $\leq$  0.05**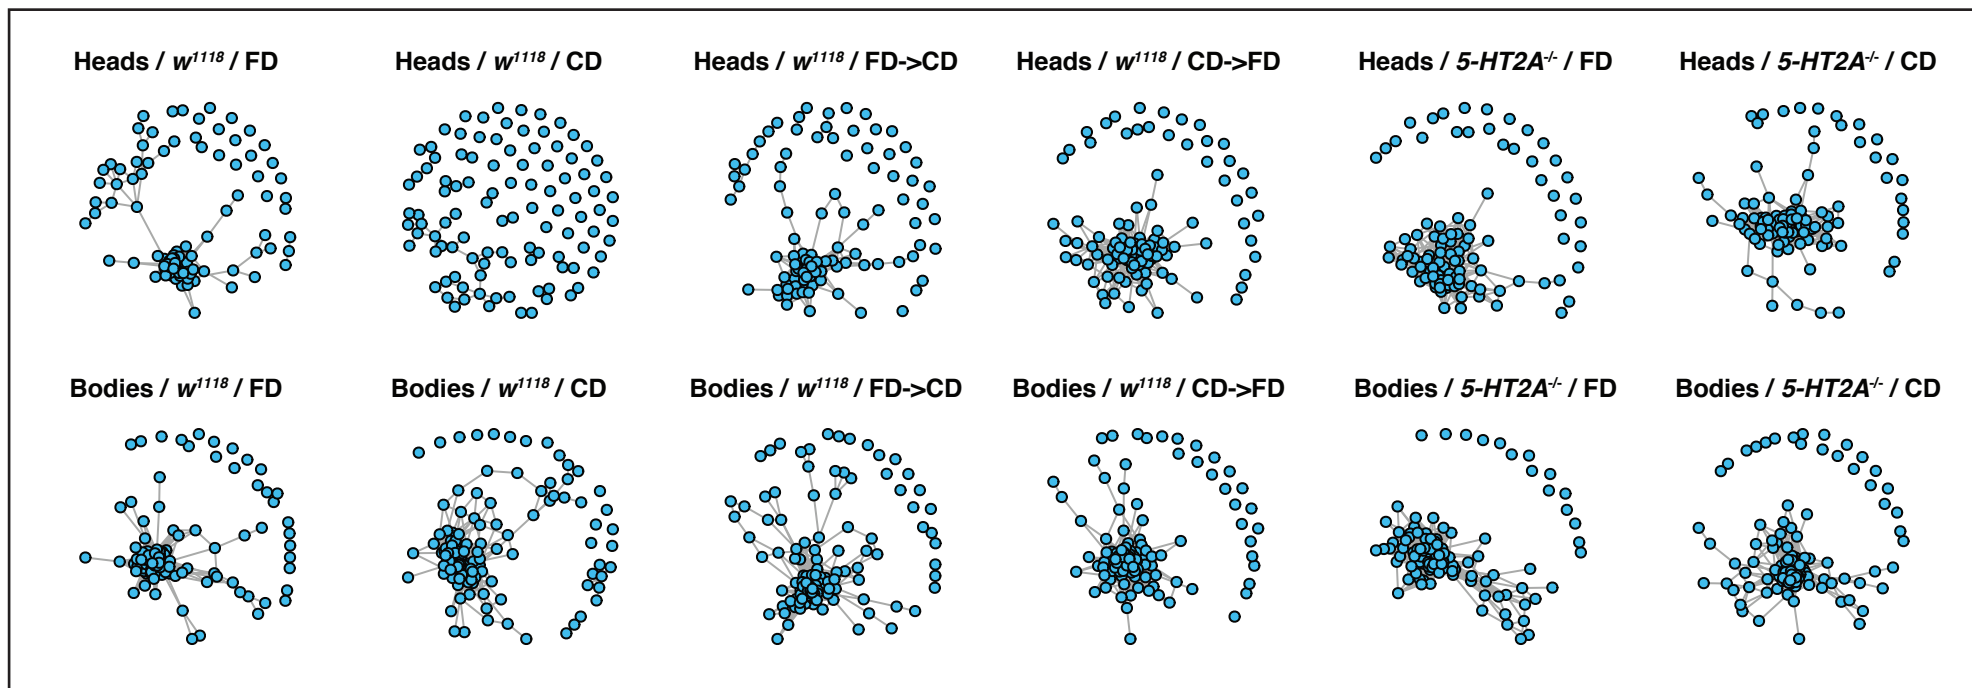

**Supplementary Figure 2. Network visualization for each group.** The Fruchterman-Reingold algorithm was used to demonstrate network organizations. We applied two cut-offs,  $FDR \leq 0.10$  (a) and  $FDR \leq 0.05$  (b) to determine the edges of correlational networks. As the  $FDR \leq 0.05$  cut-off generated very few links in the network that was derived from the heads of control flies fed a choice diet, we decided to use  $FDR \leq 0.10$  for network construction as this criteria yielded similar network structures among groups.

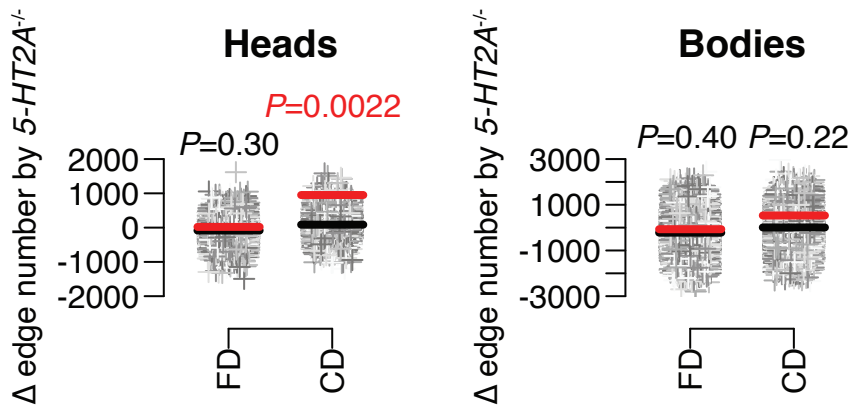

**Supplementary Figure 3. Mutated 5-HT2A allele increases the number of edges in correlation networks in a diet- and tissue-dependent manner.** We plotted the edge number of real networks (denoted as the red bar) against randomized networks (as shown by the grey dots,  $N = 10,000$ ; black bars indicate the median value of each group).  $P$ -values were obtained by permutation test. The  $P$ -element insertion in 5-HT2A significantly increases the number of edges in the heads of flies fed on a choice diet ( $P = 0.002$ ), but not in any other groups ( $P > 0.05$ ).

○ High-Degree Node   ○ Other Node

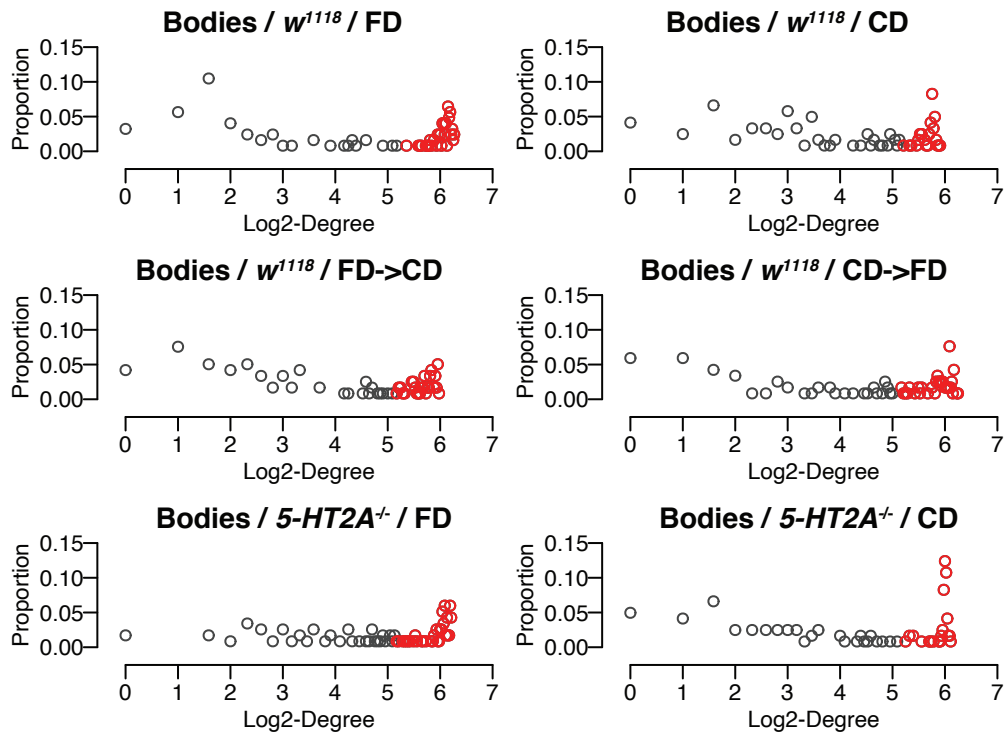

**Supplementary Figure 4. Neither dietary switch nor a mutation in  $5-HT2A$  influences the proportion of high-degree nodes in bodies.** Dot plots show the frequency of high-degree nodes and other nodes in each body group. Unlike the results from head groups, neither dietary choice, dietary switch, nor  $5-HT2A$  mutation affects the high-degree nodes in body networks.

**a**Heads /  $w^{1118}$  / FD  
Module (n=7)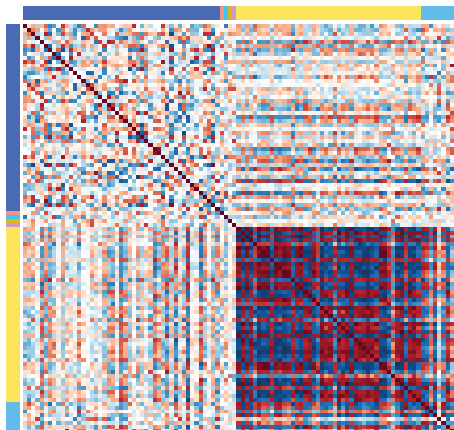Heads /  $w^{1118}$  / FD→CD  
Module (n=11)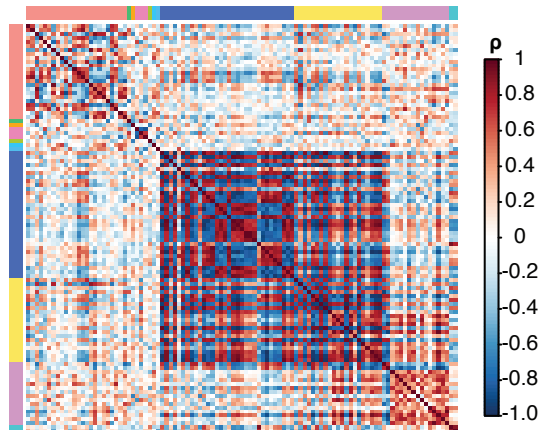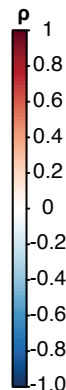**b**Heads /  $w^{1118}$  / CD  
Module (n=31)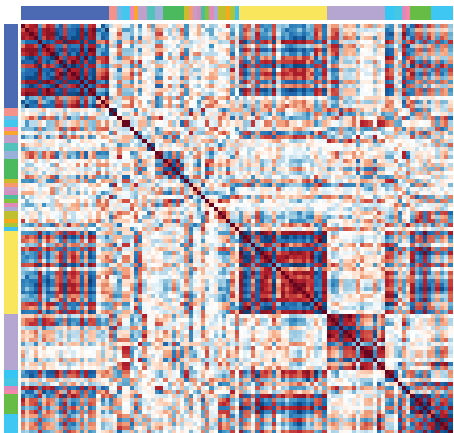Heads /  $w^{1118}$  / CD→FD  
Module (n=12)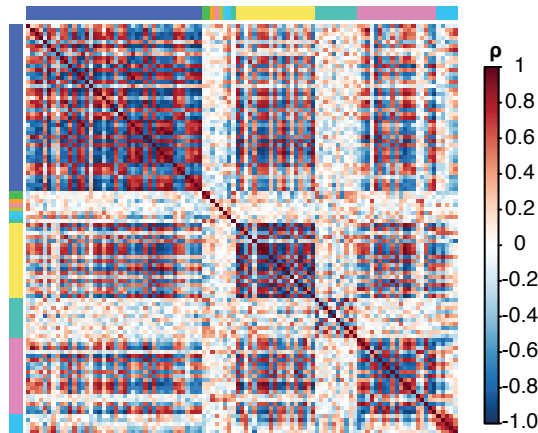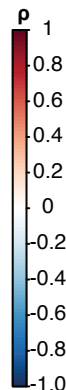

**Supplementary Figure 5. Partial reversal of community structures through a 48hr dietary switch.** Correlation plots showing the effects of dietary switch on community structures. Color bars on the side/top of the plots indicate individual modules, with yellow and blue bars representing the dominant ones (those who have more metabolites than other modules) in each group. Either switching to a choice diet (**a**) or a fixed diet (**b**) for 48 hrs is sufficient to influence the number and size of network modules, yet the effects are partial as the modularity is in between the unswitched groups.

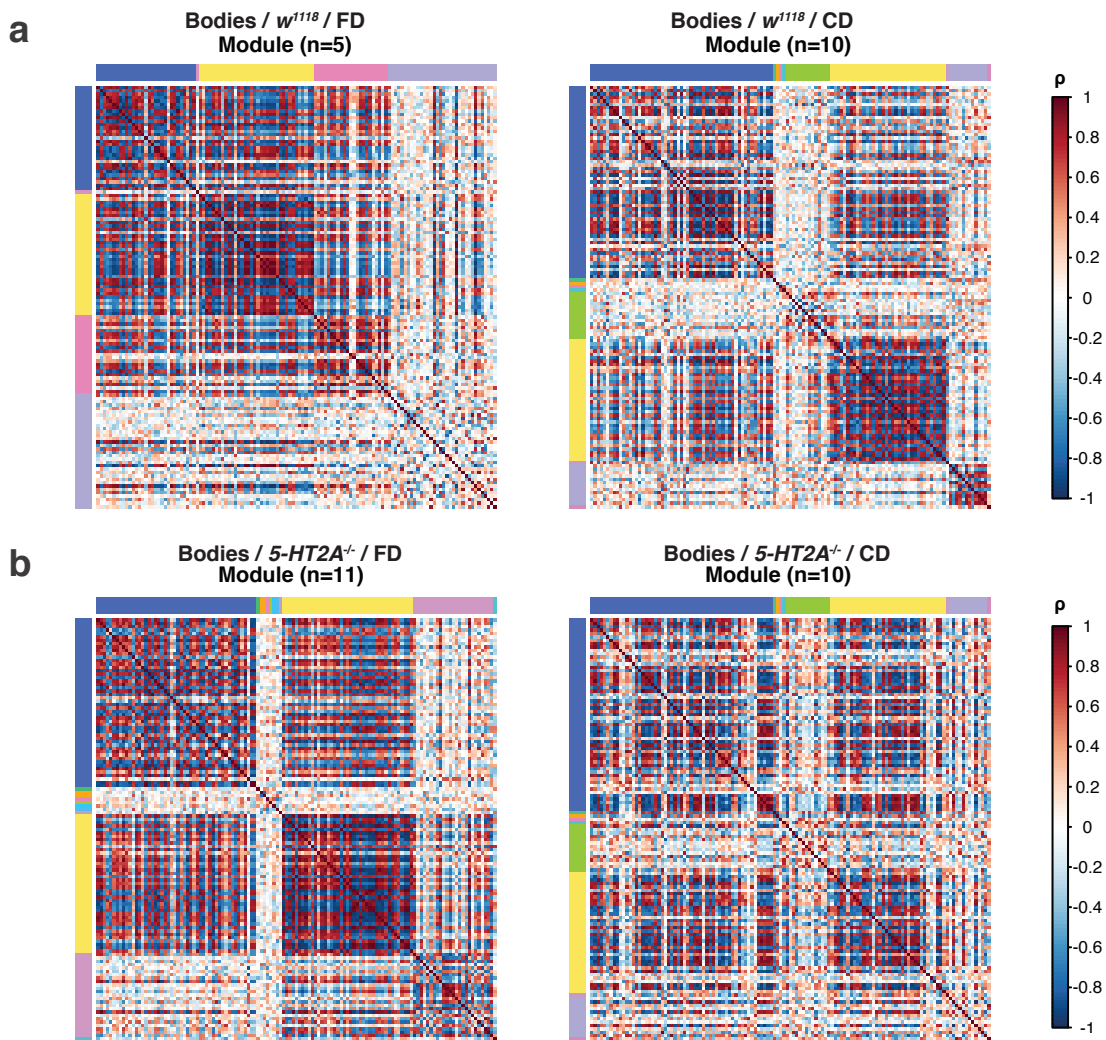

**Supplementary Figure 6. Dietary effects on network modularity in bodies.** Different from the head results, choice-induced network fragmentation in bodies is milder in control (a) and 5-*HT2A* mutant (b) flies.
