# Supplementary material for: Serotonin signaling modulates aging-associated metabolic network integrity in response to nutrient choice in Drosophila melanogaster
Source: PubMed Central journal article supplement (PMC8206115; doi:10.1038/s42003-021-02260-5), 2021-06-15
Supplement: 42003_2021_2260_MOESM3_ESM.pdf [file 42003_2021_2260_MOESM3_ESM.pdf]

## **Description of Additional Supplementary Files**

File Name: Supplementary Data 1

Description: Source Data for the starvation resistance analyses.
